# Supplementary material
Source: PubMed Central journal article supplement (PMC4572468)
Supplement: mmc1.pdf [file mmc1.pdf]

# SUPPORTING MATERIAL

## A Practical Implicit Membrane Potential for NMR Structure Calculations of Membrane Proteins.

Ye Tian<sup>a,b</sup>, Charles D. Schwieters<sup>c</sup>, Stanley J. Opella<sup>b</sup> and Francesca M. Marassi<sup>a,\*</sup>

<sup>a</sup>Sanford-Burnham Medical Research Institute, 10901 North Torrey Pines Road, La Jolla, CA 92037, USA.

<sup>b</sup>Department of Chemistry and Biochemistry, University of California San Diego, 9500 Gilman Drive, La Jolla, CA 92093-0307, USA.

<sup>c</sup>Division of Computational Bioscience, Building 12A, Center for Information Technology, National Institutes of Health, Bethesda, Maryland 20892-5624.

### Supplementary Table

**Table S1.** *eefxPot* Membrane insertion energy (kcal/mol) obtained for Ala<sub>25</sub> and Leu<sub>25</sub> with different values of the dielectric screening parameter  $a$ .

|                      | $a = 0.85$        |                   | $a = 0$           |                   |
|----------------------|-------------------|-------------------|-------------------|-------------------|
|                      | Ala <sub>25</sub> | Leu <sub>25</sub> | Ala <sub>25</sub> | Leu <sub>25</sub> |
| $\Delta E_{EFF-IMM}$ | 1.6               | -45.7             | -364.7            | -317.4            |
| $\Delta E_{ELEC}$    | -42.6             | -26.5             | -408.9            | -298.2            |
| $\Delta E_{SLV}$     | 44.2              | -19.2             | 44.2              | -19.2             |

For each peptide helix, the membrane-inserted state was generated by positioning the center of mass at the membrane center ( $z = 0$ ) and the helix axis parallel to the membrane normal, while the surface-adsorbed state had the center of mass at the membrane surface ( $z = T/2$ ) and helix axis perpendicular to the membrane normal. After subjecting each state to a 300-step minimization, the free energy of insertion was evaluated as the difference between the energies in the two states.

## Supplementary Figures

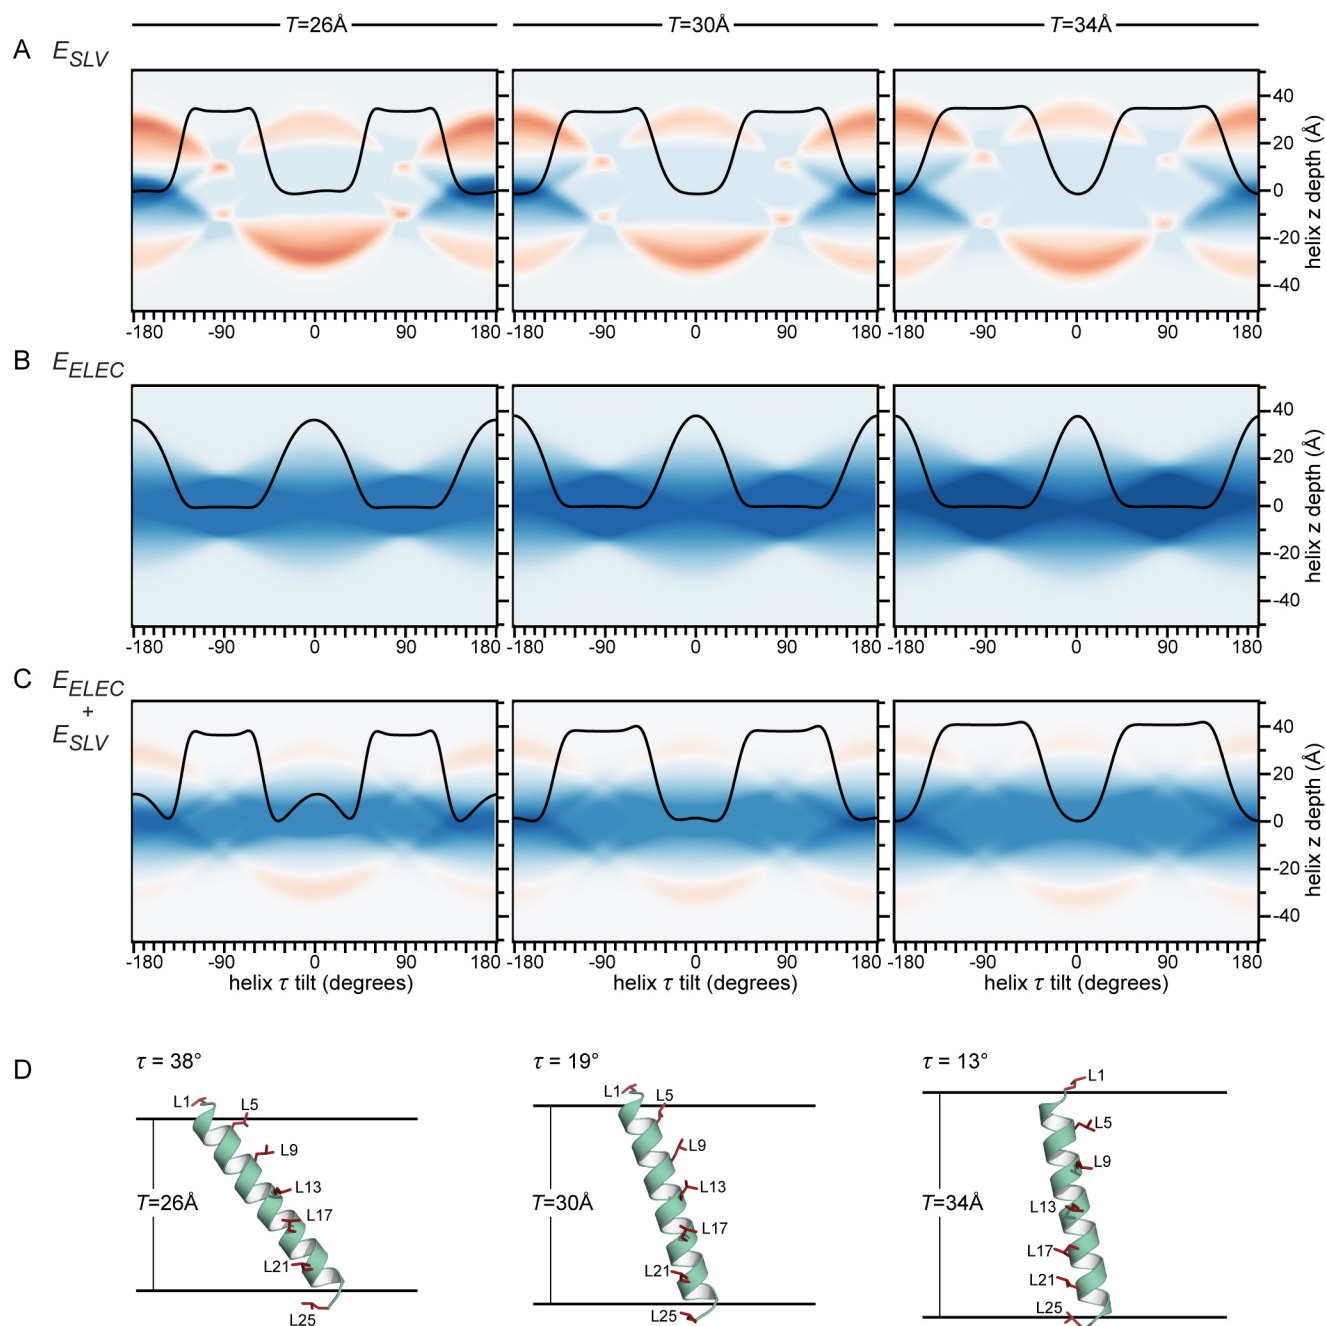

**Fig. S1. Energy landscape and position of Leu<sub>25</sub> in *eefxPot* membranes of thickness  $T = 26 \text{ \AA}$ ,  $30 \text{ \AA}$  and  $34 \text{ \AA}$ .** (A-C) The landscape was mapped by holding the peptide helix as a rigid body, placing it at various membrane depths along the membrane  $z$  axis and rotating through  $360^\circ$  around the membrane  $y$  axis. Solid lines trace the energy profiles for peptide helix tilt at a membrane depth of  $z = 0 \text{ \AA}$ . Since the peptide backbone and side chains were treated as one rigid body in this calculation, the value of  $E_{VDW}$  remains constant and was not included in the analysis. (D) The transmembrane helix tilt of Leu<sub>25</sub> depends on the model membrane thickness. Structures were generated with 200 ps of unrestrained *eefxPot* MD simulation in the three different membrane thicknesses. The membrane is represented by horizontal lines separated by thickness  $T$ . Simulations were performed at 300 K.

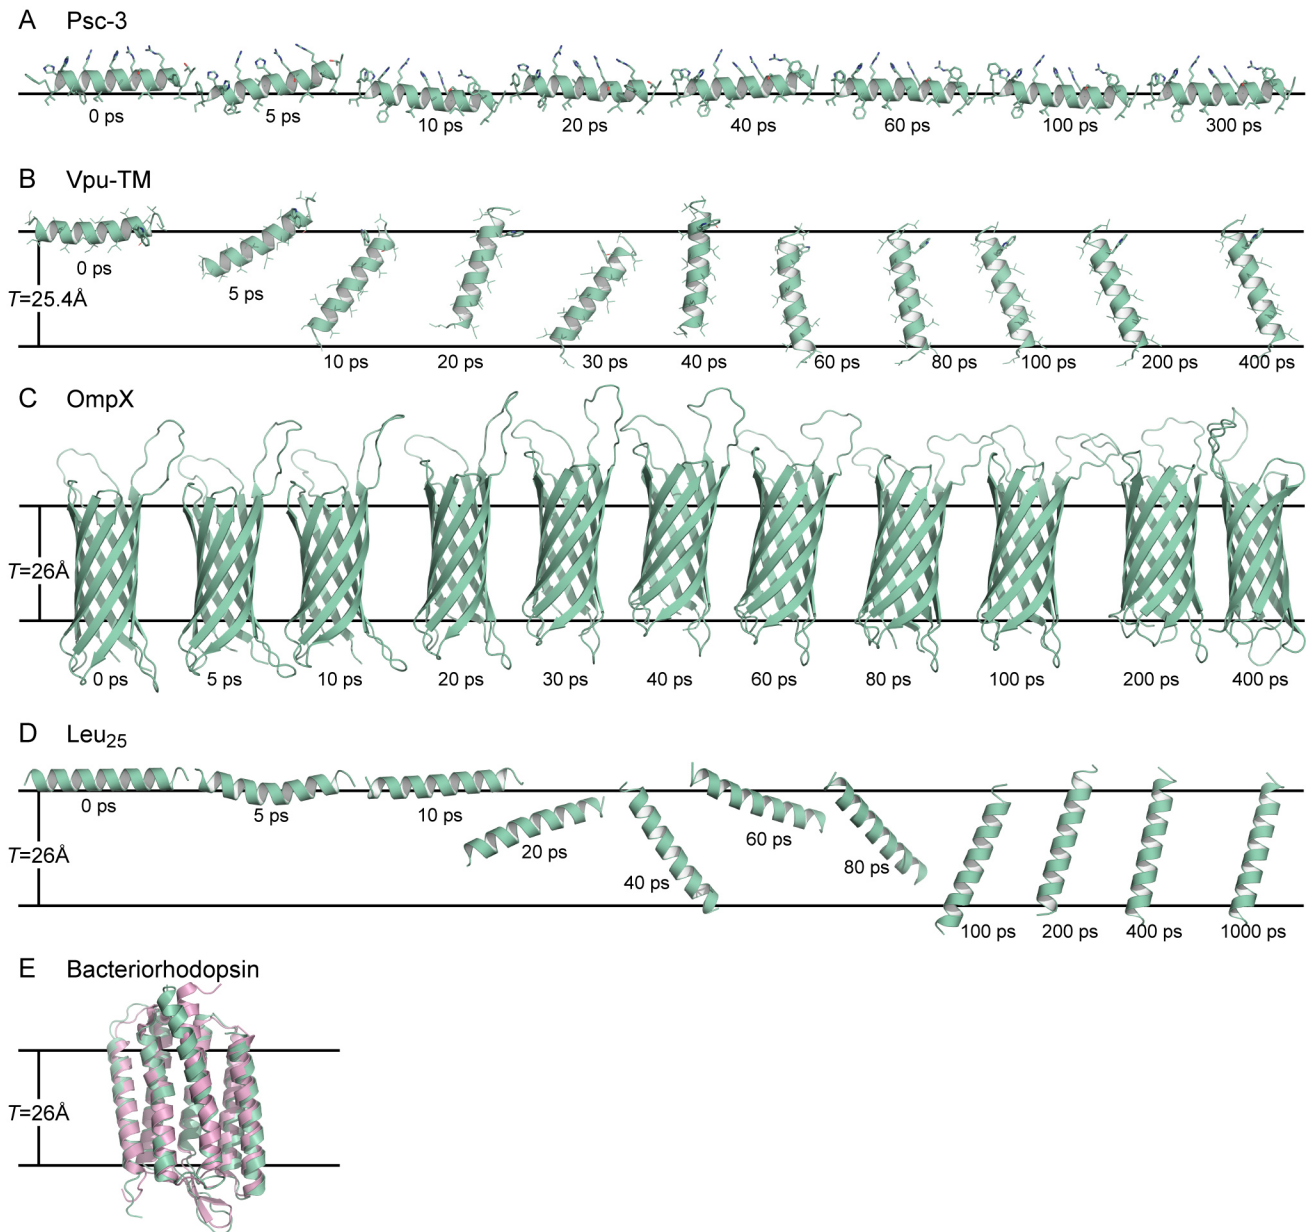

**Fig. S2. Structure snapshots taken from unrestrained *efxPot* MD simulations of Psc-3 (PDB 2MCW), Vpu-TM (PDB 1PI7), OmpX (PDB 2M06) and bacteriorhodopsin (PDB 1M0L). The membrane is represented by horizontal lines separated by thickness  $T$ . Simulations were performed at 300 K.**
